# Supplementary material for: Deactivation of excitatory neurons in the prelimbic cortex via Cdk5 promotes pain sensation and anxiety
Source: PubMed Central journal article supplement (PMC4518290; doi:10.1038/ncomms8660), 2015-07-16
Supplement: ncomms8660-s1.pdf [file ncomms8660-s1.pdf]

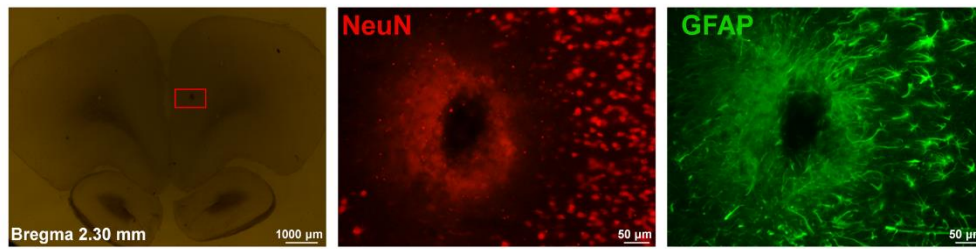

**Figure S1. Injection of quinolinic acid into the PL induces the neuronal loss in the PL.** The immunostaining of NeuN and GFAP 7 d after the injection of quinolinic acid into the PL. Bregma 2.30 mm. Scale bar, left, 1000 μm; middle and right, 50 μm.

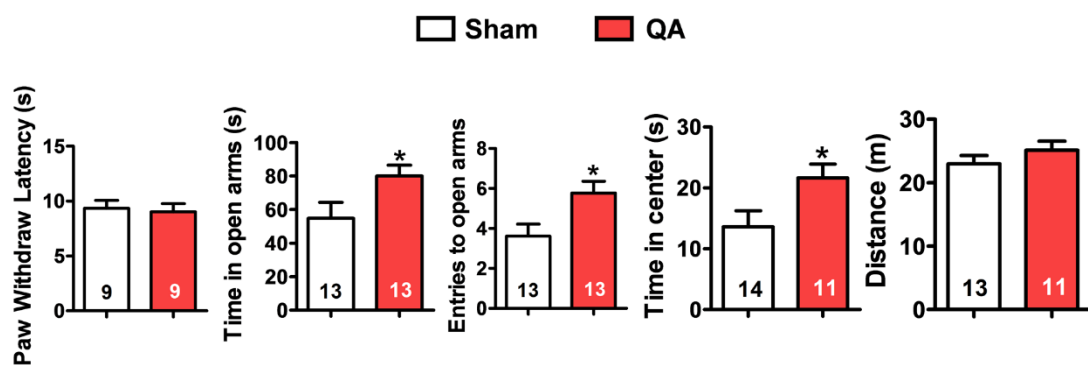

**Figure S2. Bilateral lesion of the PL attenuates anxiety-like behaviors without affecting the paw withdrawal latency.** Paw withdrawal latency, elevated plus maze, open field test and locomotor activity of the rats after bilateral lesion of the PL by quinolinic acid ( $*P < 0.05$ , two-tailed  $t$ -test).

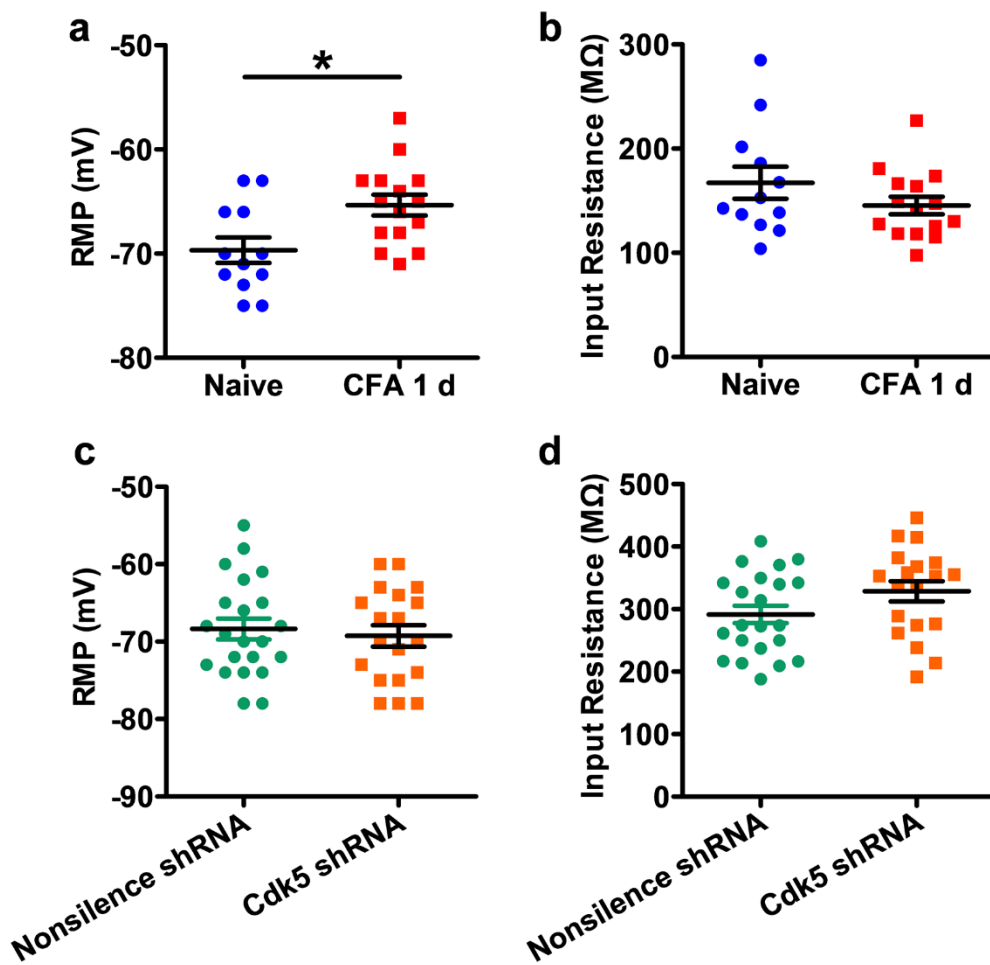

**Figure S3. Membrane properties of layer 2/3 pyramidal neurons in the PL.**

(a, b) Resting membrane potential and input resistance of neurons from the naïve rats and the rats 1 d after CFA. Neurons from the rats 1 d after CFA exhibited mildly more positive resting membrane potentials compared with the naïve rats (naïve,  $-69.67 \pm 1.221$  mV,  $n=12$  neurons; CFA 1 d,  $-65.33 \pm 0.9984$  mV,  $n=15$  neurons;  $*P < 0.05$ , two-tailed  $t$ -test). (c, d) Resting membrane potential and input resistance of neurons from the nonsense shRNA and Cdk5 shRNA rats 1 d after CFA. No significant differences were identified between the groups (two-tailed  $t$ -test).

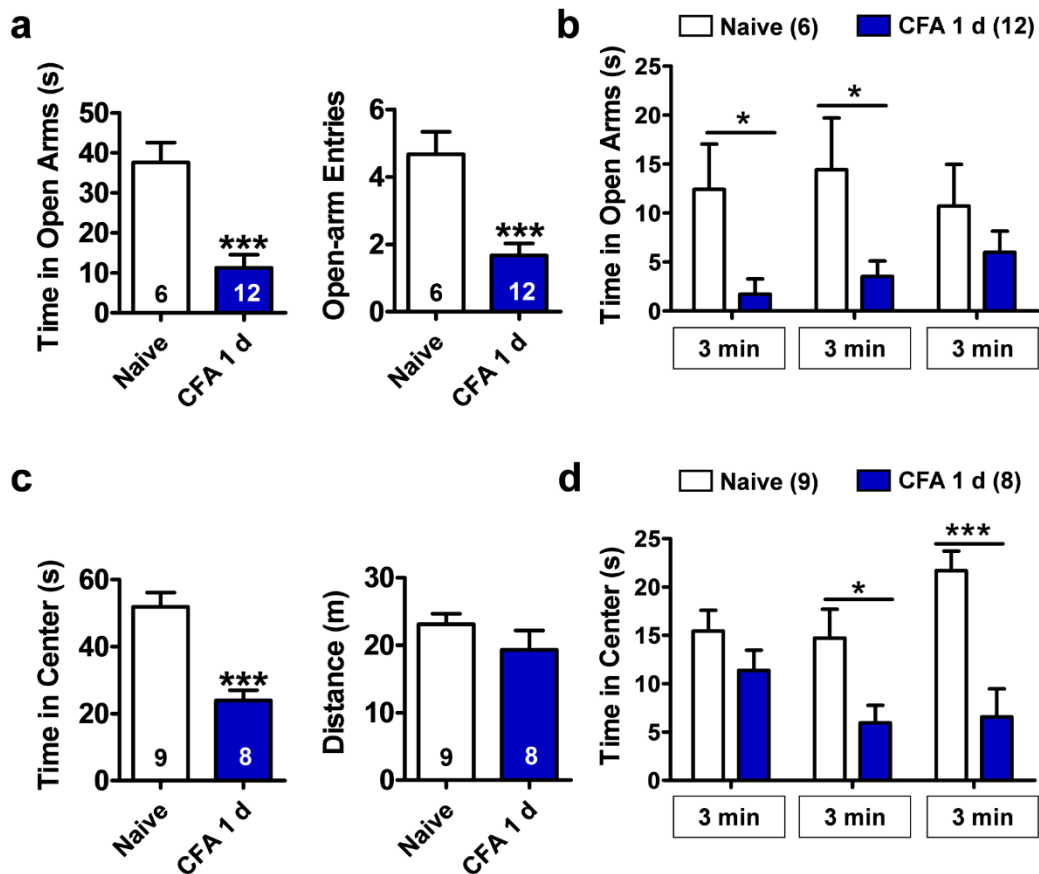

**Figure S4. CFA induces the anxiety-like behaviors in C57BL/6J mice.** (a) Elevated plus maze of 9-min test time (n=6, 12 animals, \*\*\* $P$ <0.001, two-tailed  $t$ -test) in the mice 1 d after CFA injection. (b) The time in the open arms of three continuous 3 min in the mice 1 d after CFA injection (n=6, 12 animals, \* $P$ <0.05, two-way ANOVA with Bonferroni post-tests). (c) Open field test of 9-min test time (n=9, 8 animals, \*\*\* $P$ <0.001, two-tailed  $t$ -test) in the mice 1 d after CFA injection. (d) The time in the center of three continuous 3 min in the mice 1 d after CFA injection (n=9, 8 animals, \* $P$ <0.05, \*\*\* $P$ <0.001, two-way ANOVA with Bonferroni post-tests).

## Contralateral PL

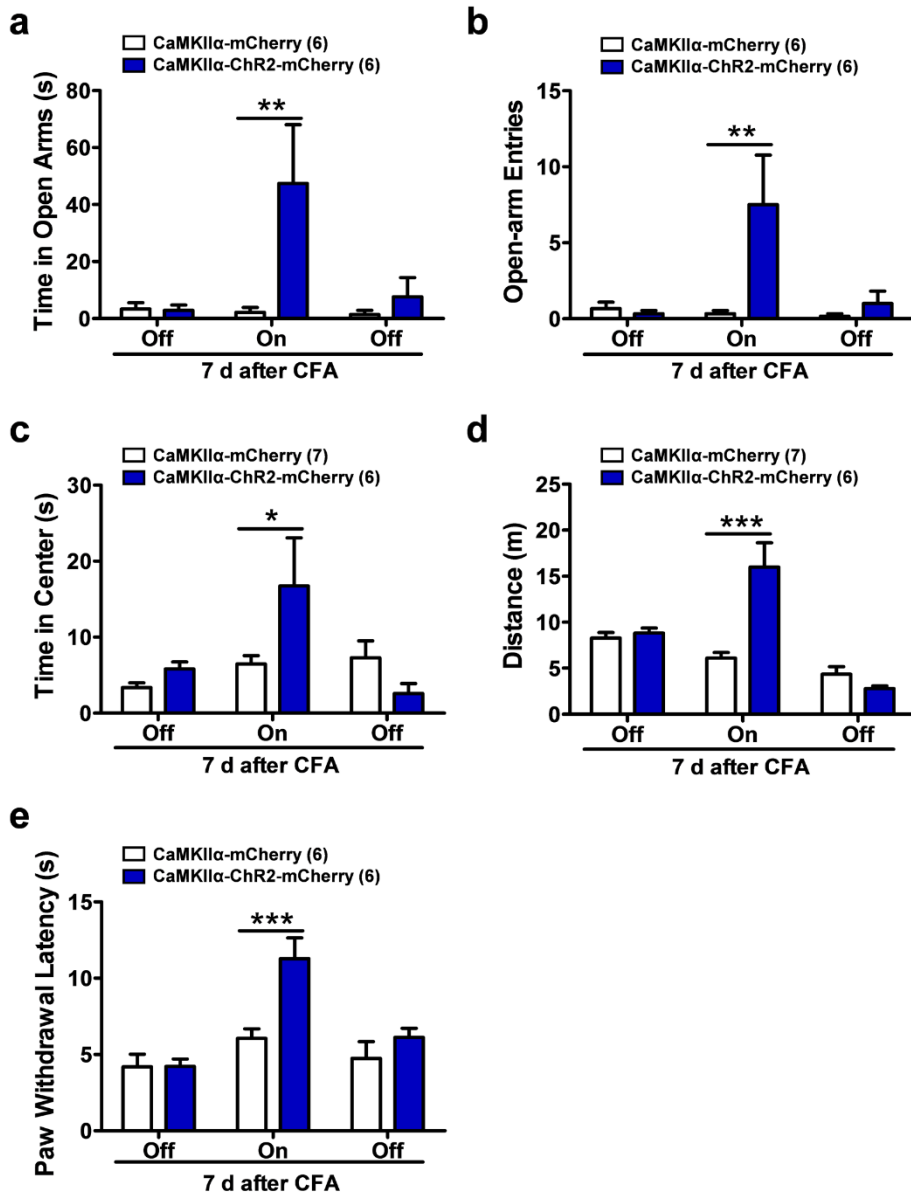

**Figure S5. Optogenetic activation of the contralateral PL excitatory neurons 7 d after CFA attenuates CFA-induced heat hyperalgesia and anxiety-like behaviors.** Elevated plus maze, open field test, locomotor activity and paw withdrawal latency in the CFA mice of the AAV-CaMKIIα-mCherry or AAV-CaMKIIα-ChR2-mCherry virus injection with 20 Hz, 6–9 mW 473 nm blue light off-on-off stimulation (\* $P < 0.05$ , \*\* $P < 0.01$ , \*\*\* $P < 0.001$ , two-way ANOVA with Bonferroni post-tests).

## Ipsilateral PL

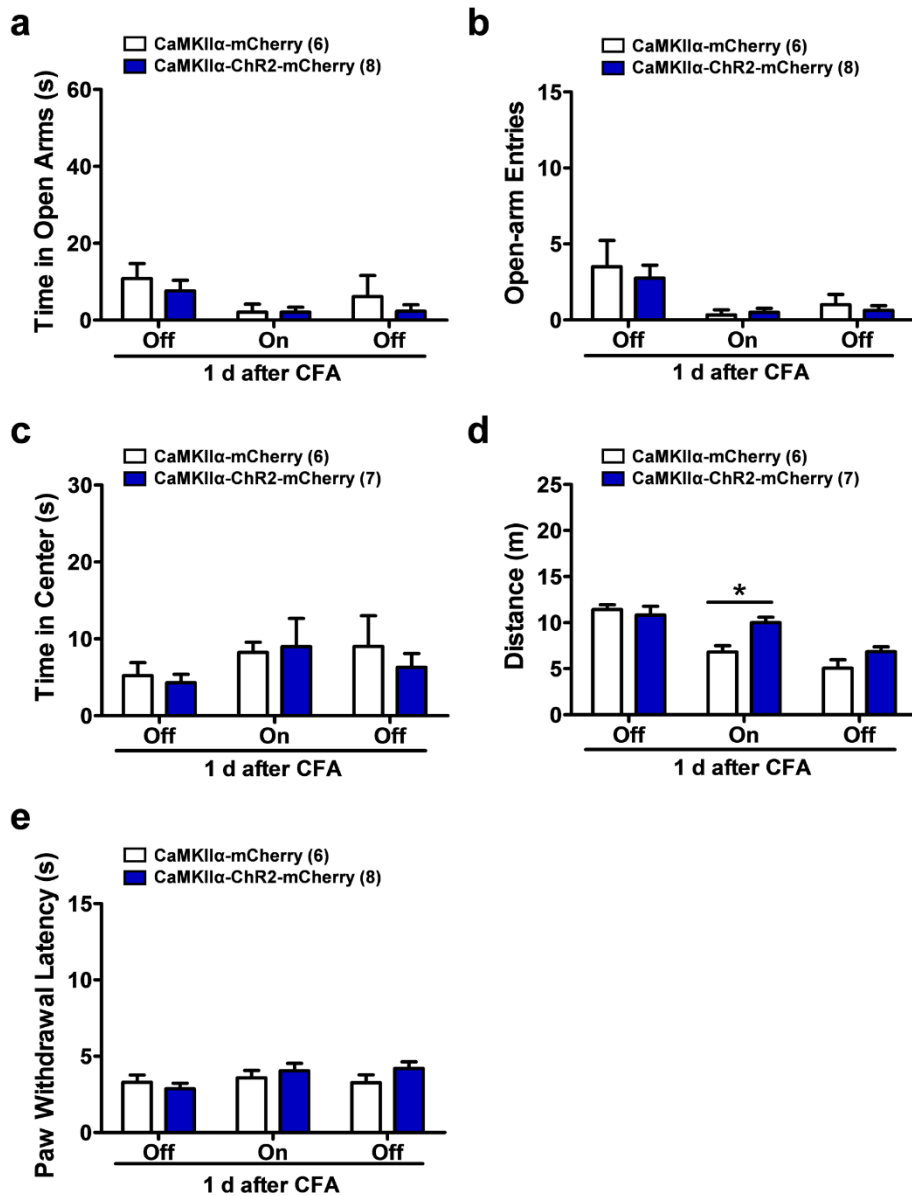

**Figure S6. Optogenetic activation of ipsilateral PL excitatory neurons does not reverse CFA-induced heat hyperalgesia and anxiety-like behaviors.** Elevated plus maze, open field test, locomotor activity and paw withdrawal latency in the CFA mice of the AAV-CaMKII $\alpha$ -mCherry or AAV-CaMKII $\alpha$ -ChR2-mCherry virus injection with 20 Hz, 6–9 mW 473 nm blue light off-on-off stimulation (\* $P$ <0.05, two-way ANOVA with Bonferroni post-tests).

## Contralateral IL

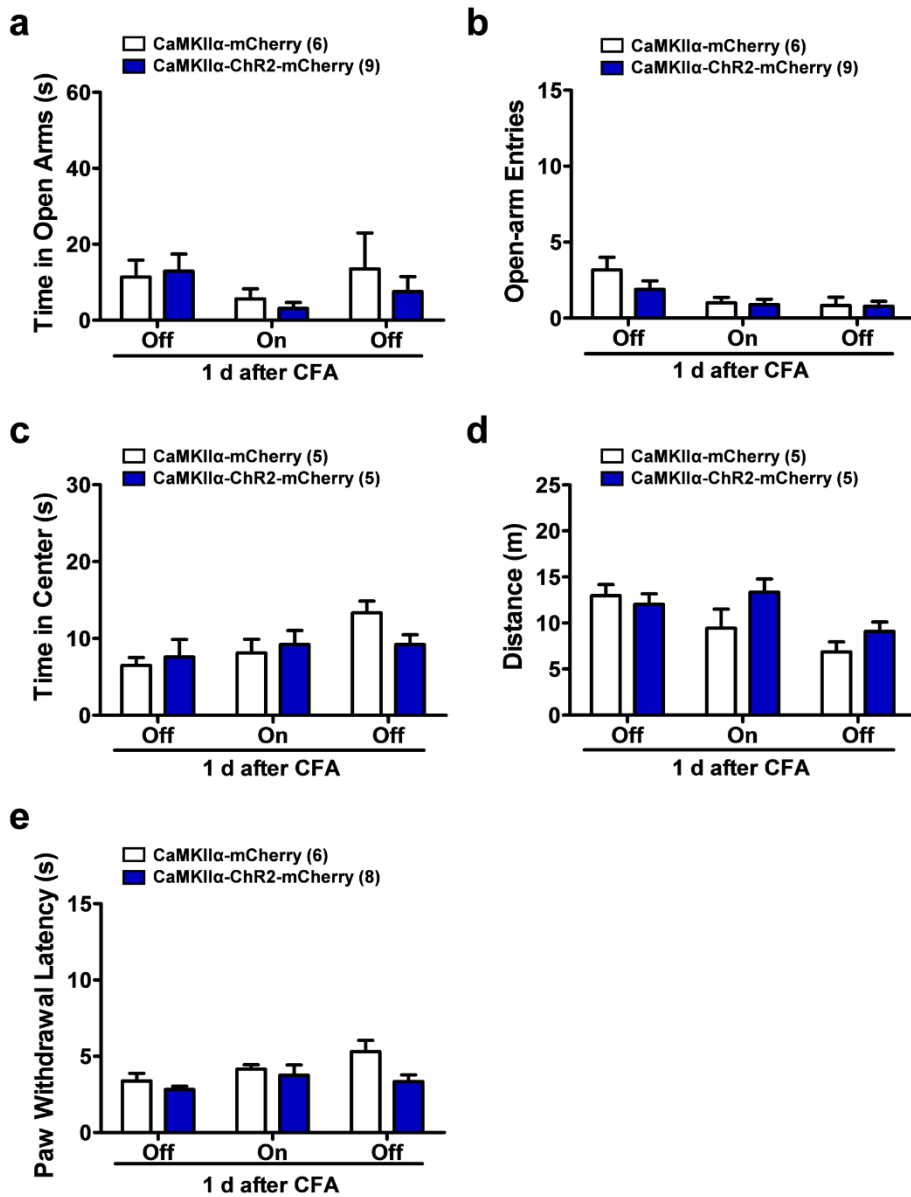

**Figure S7. Optogenetic activation of the contralateral IL excitatory neurons does not reverse CFA-induced heat hyperalgesia and anxiety-like behaviors.** Elevated plus maze, open field test, locomotor activity and paw withdrawal latency in the CFA mice of the AAV-CaMKII $\alpha$ -mCherry or AAV-CaMKII $\alpha$ -ChR2-mCherry virus injection with 20 Hz, 6–9 mW 473 nm blue light off-on-off stimulation (two-way ANOVA with Bonferroni post-tests).

## Contralateral CG1

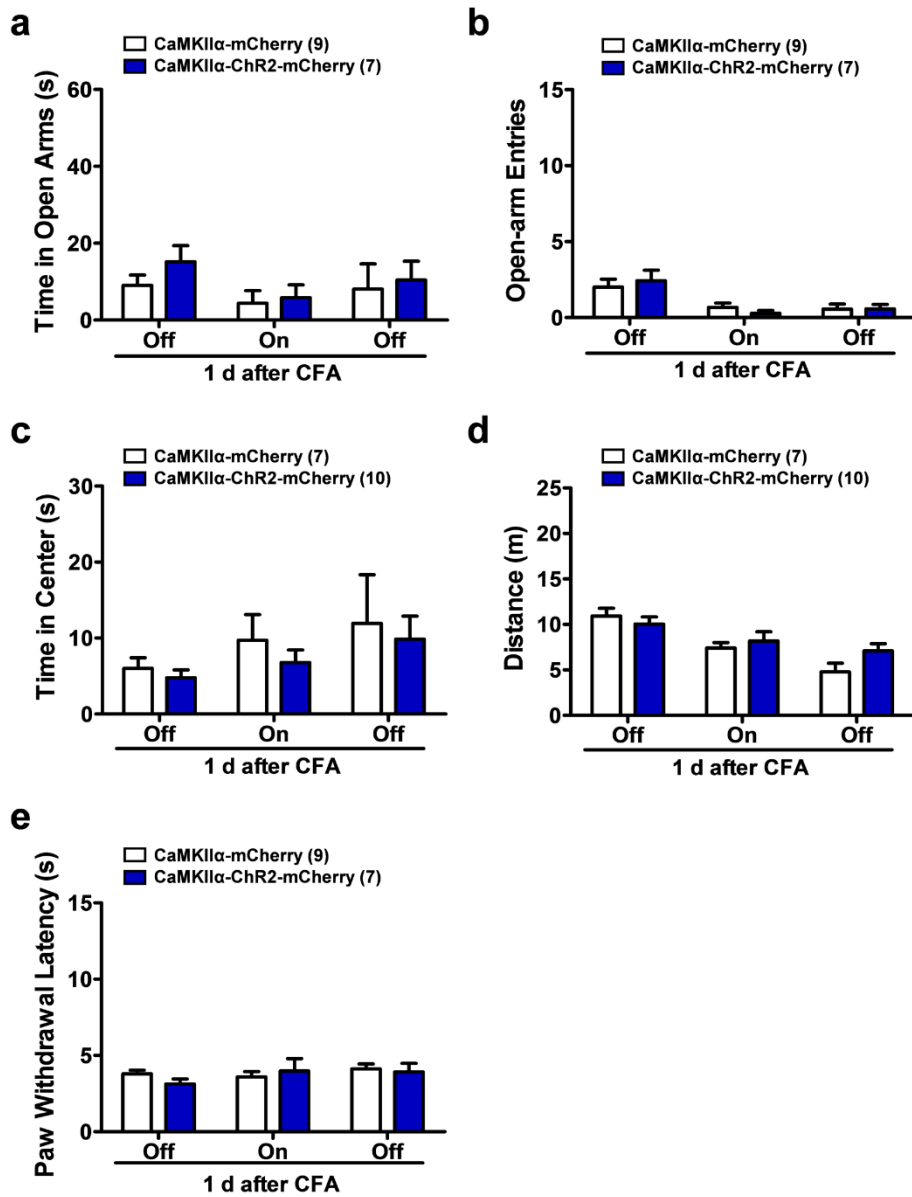

**Figure S8. Optogenetic activation of the contralateral CG1 excitatory neurons does not reverse CFA-induced heat hyperalgesia and anxiety-like behaviors.** Elevated plus maze, open field test, locomotor activity and paw withdrawal latency in the CFA mice of the AAV-CaMKII $\alpha$ -mCherry or AAV-CaMKII $\alpha$ -ChR2-mCherry virus injection with 20 Hz, 6–9 mW 473 nm blue light off-on-off stimulation (two-way ANOVA with Bonferroni post-tests).



## Unilateral PL

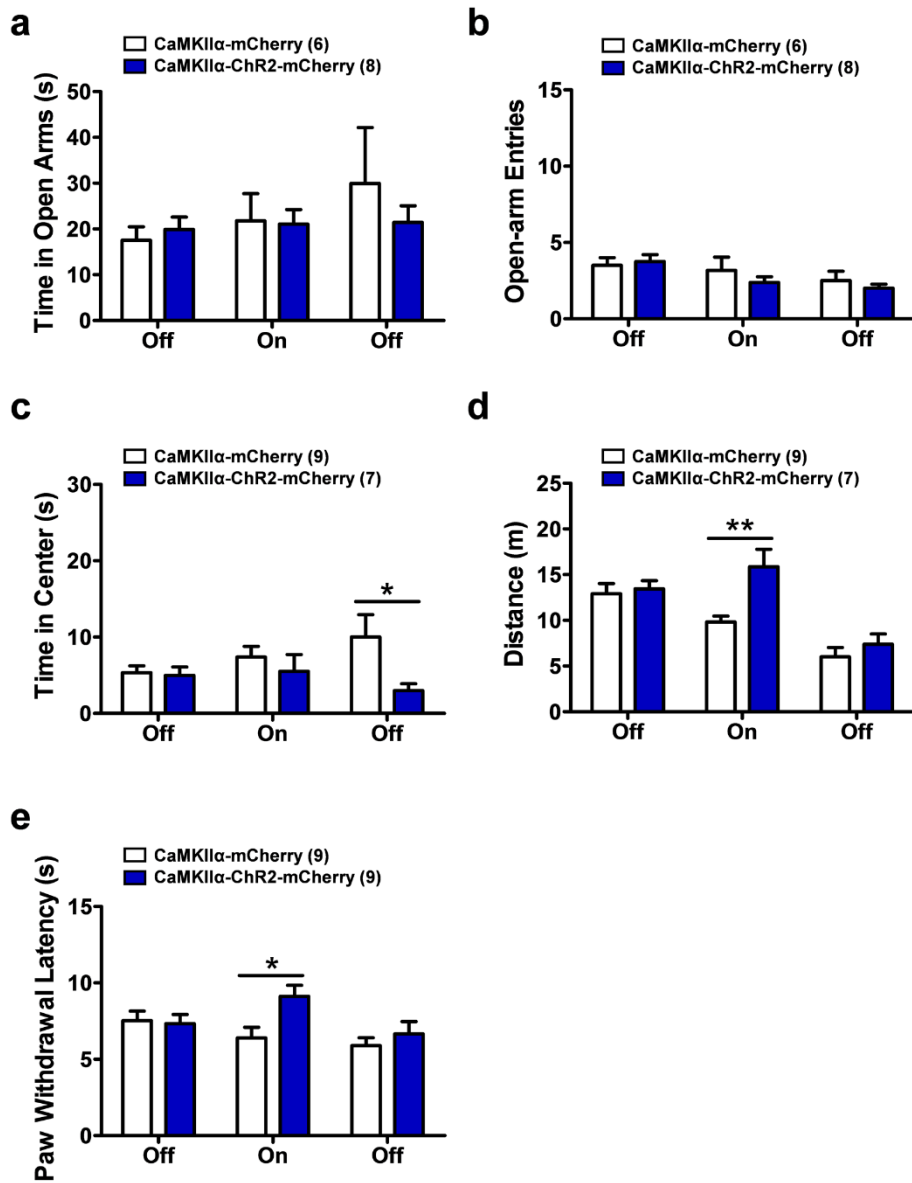

**Figure S9. Optogenetic activation of unilateral PL excitatory neurons in naïve mice increases the paw withdrawal latency without affecting anxiety-like behaviors.** Elevated plus maze, open field test, locomotor activity and paw withdrawal latency in the naïve mice of the AAV-CaMKII $\alpha$ -mCherry or AAV-CaMKII $\alpha$ -ChR2-mCherry virus injection with 20 Hz, 6–9 mW 473 nm blue light off-on-off stimulation (\* $P$ <0.05, \*\* $P$ <0.01, two-way ANOVA with Bonferroni post-tests).
